# Supplementary material for: Integrative Computational and Experimental Approaches to Establish a Post-Myocardial Infarction Knowledge Map
Source: PLoS Comput Biol. 2014 Mar 20;10(3):e1003472. doi: 10.1371/journal.pcbi.1003472 (PMC3961365; doi:10.1371/journal.pcbi.1003472)
Supplement: Table S8 — MI knowledge map protein membership. Note: While some proteins might be involved in different pathways, we showed only the relevant relationships and not all possible relationships. (XLSX) [file pcbi.1003472.s011.xlsx]

## Sheet: Sheet1
Table S8: MI knowledge map protein membership. Note: While some proteins might be involved in different pathways, we showed only the relevant relationships and not all possible relationships.
* Note: Display names are Uniprot ID.
Acute MI (AMI)	Hypoxia (H)	Signaling pathways (S)	Kinases pathways (K)	Angiogensis (A)	Inflammatory response (I)	LV remodeling (L)
A4	BKRB2	CD14	P85A	ACTN2	CASP3	CO1A1
ANT3	CDN1A	EP300	TGBR3	AKT1	CASP8	CO1A2
CO4A6	CSN5	IKKB	CSK21	CAN1	CAV1	CO2A1
F13A	DNJB1	IL8	BMP2	CDC42	CCL2	CO3A1
FA10	HIF1A	IRAK2	ANFB	CRK	CCL3	CO4A1
FA11	HS90A	JUN	KC1A	ELAV1	CCR1	CO4A2
FA5	IBP3	LY96	SUH	EZRI	CCR3	CO4A3
FA8	NOS3	SKIL	CTNB1	FAK2	CCR4	CO4A4
FA9	VEGFA	SMAD2	FBW1A	FYN	CCR5	CO4A5
FIBA	VGFR2	SMAD3	HNF1A	ILK	CD36	COIA1
IC1		SMAD7	WNT1	ITB1	CD4	MMP14
KNG1		TAB2	ADA17	KPCA	CXCR4	MMP2
PAI1		TGFB1	APC	KSYK	HDAC3	MMP9
PAR1		TGFR1	HMGN1	LAMA3	IFNG	RECK
PLMN		TGFR2	DAXX	NEMO	IRAK1	TIMP1
PROC		TIRAP	BCL2	PAR4	MYD88	TIMP2
PROS		TLR10	IKKA	PDPK1	RB	TIMP3
TAF1		TLR2	TRADD	PECA1	RIPK1	TIMP4
TFPI1		TLR4	M3K7	PTN11	SDF1
THRB		TLR6	RPGF2	SRC	TAB1
TPA		TOLIP	HSPB1	VINC	TNAP3
UROK		TRAF6	MK03		TNFA
			TNR6		TNFB
			ITB3		TNR1A
			TLN1		TNR1B
			SH3K1		TRAF2
			PAXI		TRAF3
			PGFRA		TSP1
			RPB1
			ITAV
			EGLN
			SHC1
			CRKL
			LYN
			AGTR1
			ATF2
			RAC1
			BTK
			FAK1
